# Supplementary material for: Nanosheet-assembled, hollowed-out hierarchical γ-Fe2O3 microrods for high-performance gas sensing
Source: Royal Society of Chemistry journal article supplement (doi:10.1039/c9ta12052a), 2020-01-01
Supplement: c9ta12052a1.pdf [file c9ta12052a1.pdf]

## Supplementary Information

### Nanosheets-assembled, Hollowed-out Hierarchical $\gamma$ -Fe<sub>2</sub>O<sub>3</sub> Microrods for High-performance Gas Sensing

Zhijia Song, Hanming Chen, Susu Bao, Zhaoxiong Xie, Qin Kuang,\* Lansun Zheng

State Key Laboratory of Physical Chemistry of Solid Surfaces, Collaborative Innovation Center of Chemistry for Energy Materials, and Department of Chemistry, College of Chemistry and Chemical Engineering, Xiamen University, Xiamen, 361005, P. R. China. E-mail: qkuang@xmu.edu.cn

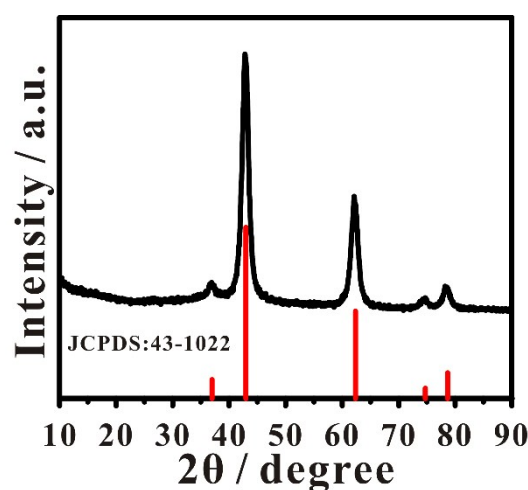

**Fig. S1** XRD pattern of MgO.

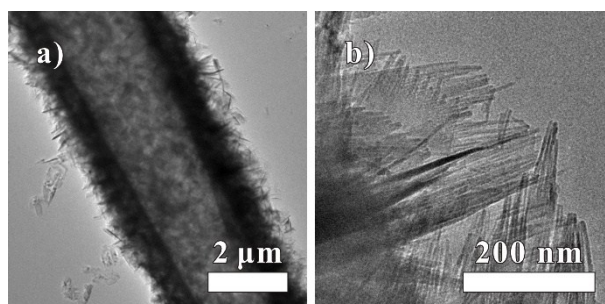

**Fig. S2** TEM images of FeOOH.

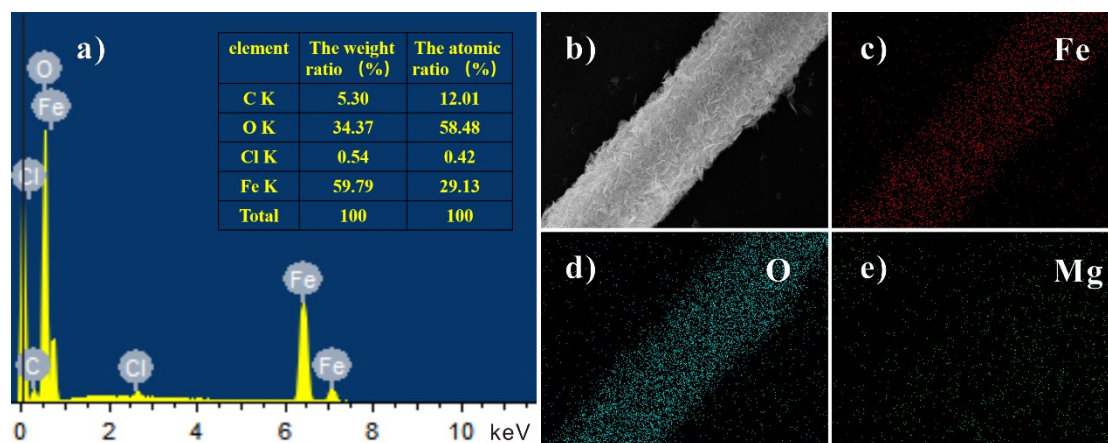

**Fig. S3** (a) EDS spectrum and (b-e) mapping images of the FeOOH microrods.

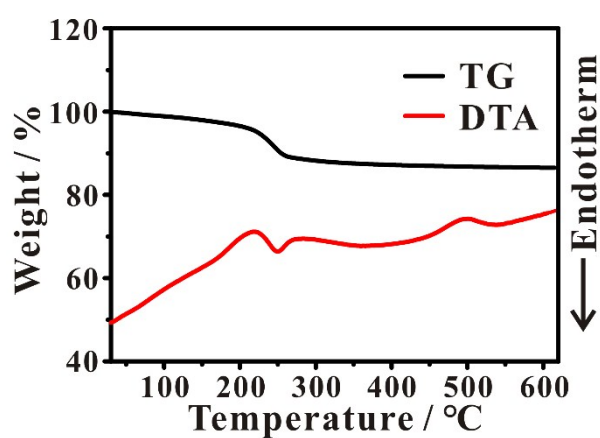

**Fig. S4** TG-DTA curves of FeOOH.

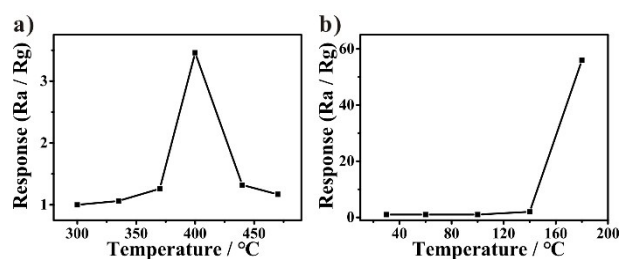

**Fig. S5** Response of the sensors based on (a) MgO, (b) FeOOH to 100 ppm acetone at different operating temperatures.

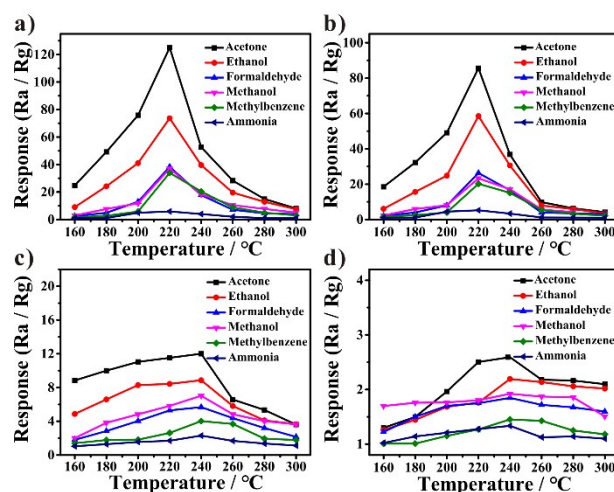

**Fig. S6** Response of the sensors based on (a)  $\text{Fe}_2\text{O}_3$ -300, (b)  $\text{Fe}_2\text{O}_3$ -400, (c)  $\text{Fe}_2\text{O}_3$ -500, and (d)  $\text{Fe}_2\text{O}_3$ -com to 100 ppm different gases at different operating temperatures.

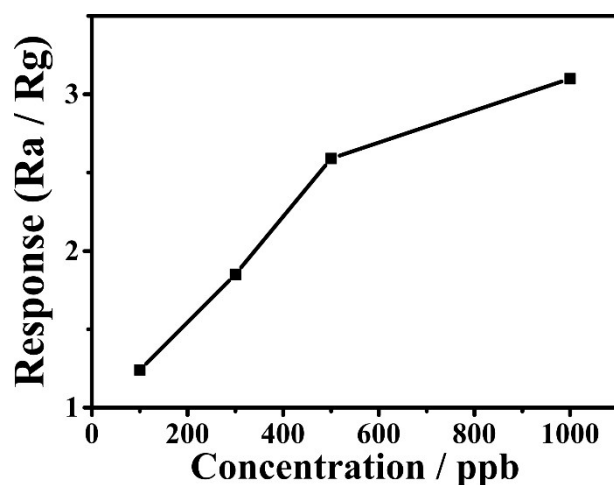

**Fig. S7** Detection limit of  $\text{Fe}_2\text{O}_3$ -300.

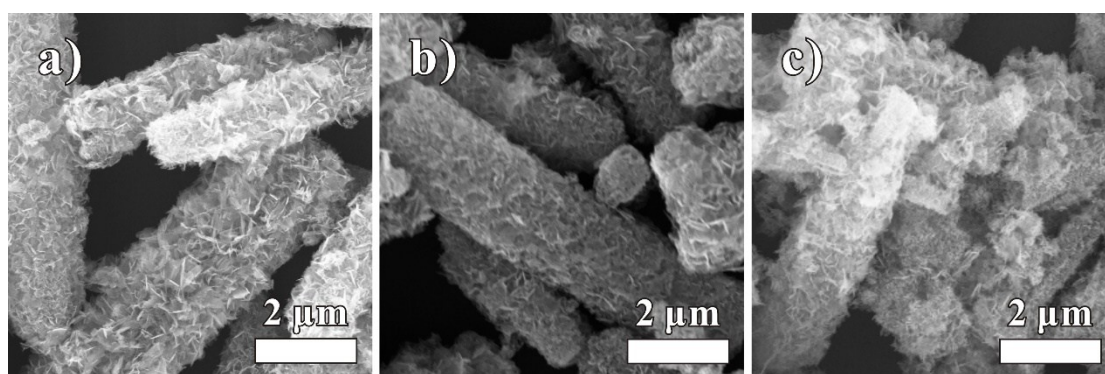

**Fig. S8** SEM images of (a)  $\text{Fe}_2\text{O}_3$ -300, (b)  $\text{Fe}_2\text{O}_3$ -400, and (c)  $\text{Fe}_2\text{O}_3$ -400 after long-term stability test.

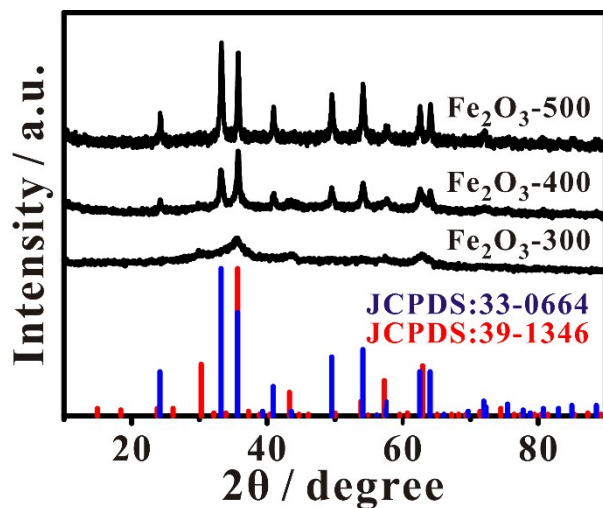

**Fig. S9** XRD patterns of  $\text{Fe}_2\text{O}_3$ -300,  $\text{Fe}_2\text{O}_3$ -400, and  $\text{Fe}_2\text{O}_3$ -500 after long-term stability tests.

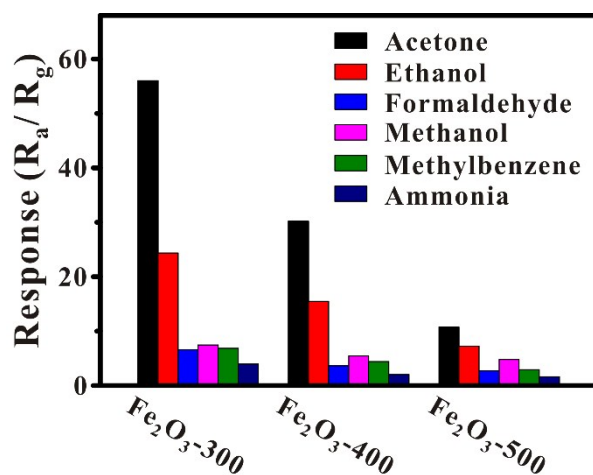

**Fig. S10** Response of sensors based on  $\text{Fe}_2\text{O}_3$ -300,  $\text{Fe}_2\text{O}_3$ -400, and  $\text{Fe}_2\text{O}_3$ -500 to 100 ppm different gases at their individual optimal operating temperatures in 87% RH humid ambient condition.

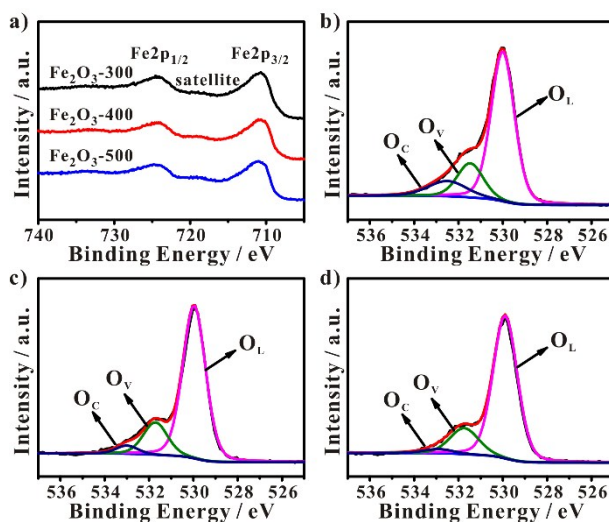

**Fig. S11** (a) Fe 2p XPS spectra and O 1s XPS spectra of the three samples: (b) Fe<sub>2</sub>O<sub>3</sub>-300, (c) Fe<sub>2</sub>O<sub>3</sub>-400, and (d) Fe<sub>2</sub>O<sub>3</sub>-500 after long-term stability tests.

**Table S1.** Fitting results of O 1s XPS spectra of three Fe<sub>2</sub>O<sub>3</sub> samples after long-term stability test.

| Samples                             | Relative percentage (%) |                |                |
|-------------------------------------|-------------------------|----------------|----------------|
|                                     | O <sub>L</sub>          | O <sub>V</sub> | O <sub>C</sub> |
| Fe <sub>2</sub> O <sub>3</sub> -300 | 70.3                    | 17.8           | 11.9           |
| Fe <sub>2</sub> O <sub>3</sub> -400 | 78.8                    | 17.2           | 4.0            |
| Fe <sub>2</sub> O <sub>3</sub> -500 | 80.3                    | 16.9           | 2.8            |
